# Supplementary material for: Transcriptomic Screening of Alternaria oxytropis Isolated from Locoweed Plants for Genes Involved in Mycotoxin Swainsonine Production
Source: MDPI journal article supplement (doi:10.3390/jof10010088), 2024-01-22
Supplement: s1 [file s1]

## Supplementary Materials:

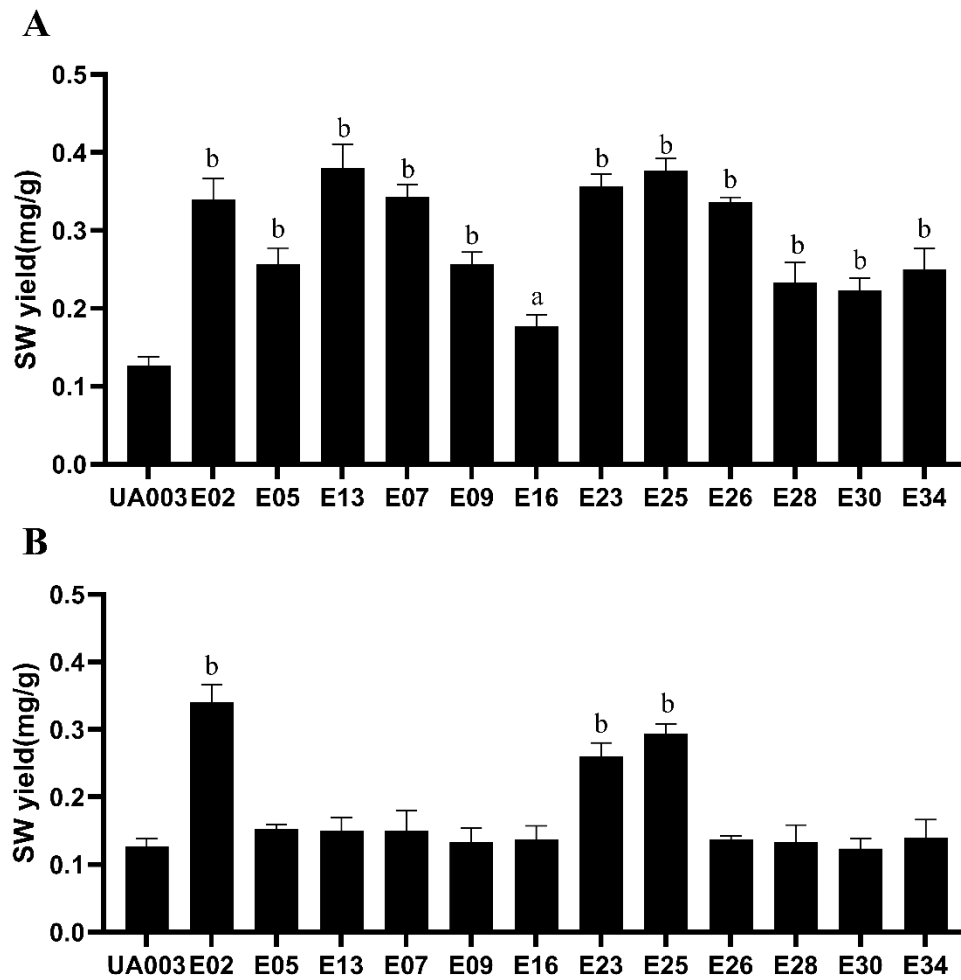

**Supplementary Figure S1 Swainsonine yield in mycelium of wild and induced strains.** **A:** The SW yield of wild type UA003 strain and each mutant strain after 30 minutes of EMS mutagenesis. **B:** The SW yield of wild type UA003 strain and each mutagenic strain after EMS mutagenesis after 30 days of culture. The data represents means  $\pm$  SD from biological experiments conducted in triplicate. Statistical significance with <sup>a</sup>  $p < 0.05$  and <sup>b</sup>  $p < 0.01$  was determined using non-parametric and parametric one-way ANOVA, respectively.

**Supplementary Table S1.** List of primers used in RT-qPCR.

| Gene name            | Primers        | Sequence (5'- 3')         | Product Size (bp) |
|----------------------|----------------|---------------------------|-------------------|
| GAPDH-F              | Forward primer | GCCGGTATCTCTCTCAACAAG     | 100 bp            |
|                      | Reverse primer | CAATGTAGACCAGGAGGTCAAG    |                   |
| evm.TU.Contig 2.197  | Forward primer | TTCTCAGGAAGCGGTGGTG       | 106 bp            |
|                      | Reverse primer | CGGGTGGGTATTGTCATTT       |                   |
| evm.TU.Contig 2.70   | Forward primer | TTGTCTACGATGACGGAAACC     | 90 bp             |
|                      | Reverse primer | AGAAACACTCTGACGCTGTAATTG  |                   |
| evm.TU.Contig 4.409  | Forward primer | TTGGTTATTACTATTCTCGGTGGAC | 249 bp            |
|                      | Reverse primer | GGTGCTCATTGCTGGGTATC      |                   |
| evm.TU.Contig 5.59   | Forward primer | CGTGCCAACATCGGAAAC        | 175 bp            |
|                      | Reverse primer | GGGAAATGATAGGAATGAACCA    |                   |
| evm.TU.Contig 6.5    | Forward primer | GCCTAAGCGATGCGAAGA        | 98 bp             |
|                      | Reverse primer | CAGTGGGGAGGTTGGAGAG       |                   |
| evm.TU.Contig 19.10  | Forward primer | CAGTGATGCACGGAGGATATAG    | 107 bp            |
|                      | Reverse primer | GCTATTCGGTTCCAAGACAGA     |                   |
| evm.TU.Contig 27.68  | Forward primer | TGAAGGCGAAGATTTAGAAGTTATT | 128 bp            |
|                      | Reverse primer | CTATGATGTAGAGGGCGAGATTG   |                   |
| evm.TU.Contig 42.58  | Forward primer | AAACTGCTCGTGGATCGCCTTTC   | 125 bp            |
|                      | Reverse primer | TCGTAAGAATCGGTTCTGTGCTG   |                   |
| evm.TU.Contig 43.38  | Forward primer | CAGGTTGGGGCGTCTACTTT      | 87 bp             |
|                      | Reverse primer | CAGTGTAGGAACGGCTGCTTT     |                   |
| evm.TU.Contig 50.48  | Forward primer | TAGGCTCGTCGCTTGTGG        | 101 bp            |
|                      | Reverse primer | ACAGCAAGGCACCTGGAAT       |                   |
| evm.TU.Contig 56.56  | Forward primer | GGTTACCTCGACTGGCTAATTC    | 99bp              |
|                      | Reverse primer | CATGACTTCTGTGGGCAGAT      |                   |
| evm.TU.Contig 21.92  | Forward primer | TTACTGCTGGACAACCATCC      | 109 bp            |
|                      | Reverse primer | GCATCACACCTTCCTTCTCTAA    |                   |
| evm.TU.Contig 1.309  | Forward primer | CTCCAACAGGCTATGGCTAACTA   | 113 bp            |
|                      | Reverse primer | AATCCTCGGTGGGGAAGTG       |                   |
| evm.TU.Contig 6.70   | Forward primer | ACATTGTTGAAAGACACCGACC    | 90 bp             |
|                      | Reverse primer | CTGCTGACGCTCACTTGGAT      |                   |
| evm.TU.Contig 14.54  | Forward primer | CCAGGTATGCGGCAAAGAA       | 248 bp            |
|                      | Reverse primer | TCGGTTGGGTAGGGGTGA        |                   |
| evm.TU.Contig 16.177 | Forward primer | TCTCTCATCTCCAACCAACTTCA   | 143 bp            |
|                      | Reverse primer | TTCCAAATGTTATCACCCACG     |                   |
| evm.TU.Contig 30.79  | Forward primer | CTTCGCCGAGATTGACCC        | 218 bp            |
|                      | Reverse primer | TTGGGTTTCATCTGGTTCACG     |                   |
| evm.TU.Contig 33.101 | Forward primer | CTACTACAAGCAAGACCCCAAAC   | 154 bp            |
|                      | Reverse primer | GCCACTTCCACCTCCAACA       |                   |
| evm.TU.Contig 36.116 | Forward primer | ACGCAAATGGGTCAGGAAGT      | 108 bp            |
|                      | Reverse primer | ACGAGTACGCAGGATGGGA       |                   |
| evm.TU.Contig 19.11  | Forward primer | GACAACGCCTCCATCTCTTT      | 119 bp            |
|                      | Reverse primer | CTCGCTTGCTACCTGCTATC      |                   |

|                     |                |                         |        |
|---------------------|----------------|-------------------------|--------|
| evm.TU.Contig 19.12 | Forward primer | GGAACCAGGTGATGCATTTG    | 105 bp |
|                     | Reverse primer | GAGATGAAGAAGAGGCCGTATAG |        |
| evm.TU.Contig 19.13 | Forward primer | GTTGTCGTTGCTGTCGCC      | 99 bp  |
|                     | Reverse primer | ATGTTTCGTCTTGTGGTTGC    |        |
| evm.TU.Contig 19.15 | Forward primer | GTCCGGGTATGTCCTGATGTT   | 120 bp |
|                     | Reverse primer | GACACATCGCCTGCCTATAC    |        |

---

**Supplementary Table S2.** Quality of data outputs.

| Sample name | Clean reads | Q20 (%) | Q30 (%) |
|-------------|-------------|---------|---------|
| CA01        | 57839364    | 96.17   | 90.48   |
| CA02        | 51342636    | 95.91   | 89.71   |
| CA03        | 50319638    | 96.73   | 91.52   |
| TA01        | 40186148    | 96.13   | 90.40   |
| TA02        | 50117874    | 96.29   | 90.45   |
| TA03        | 57814064    | 95.44   | 88.80   |
| CB01        | 59483678    | 95.68   | 89.28   |
| CB02        | 57311310    | 96.78   | 91.67   |
| CB03        | 59358510    | 95.82   | 89.51   |
| TB01        | 53186892    | 96.77   | 91.60   |
| TB02        | 55440578    | 96.72   | 91.44   |
| TB03        | 50891492    | 97.07   | 92.22   |
